# Supplementary material for: Fabrication of Six Manganese Containing Polyoxometalate Modified Graphite C3N4 Nanosheets Catalysts Used to Catalyze Water Decomposition
Source: MDPI journal article supplement (doi:10.3390/catal11070856), 2021-07-17
Supplement: s1 [file s1]

Archive with 1 entries (1 files):
- catalysts-1282722-supplementary.pdf
